# Supplementary material
Source: Springer Nature journal article supplement (https://www.springermedizin.de/resource/supplementary/12986_2014_592_MOESM3_ESM.pdf/25655092)

# TLR-4 and MyD88 Protein

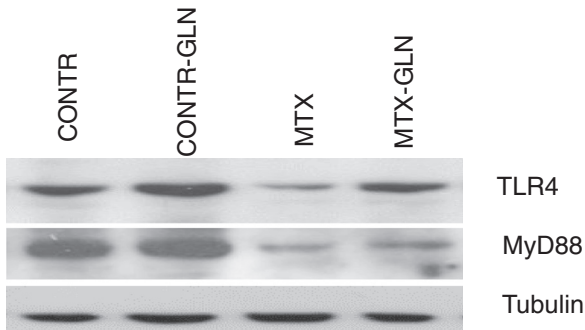

## MyD88 Protein

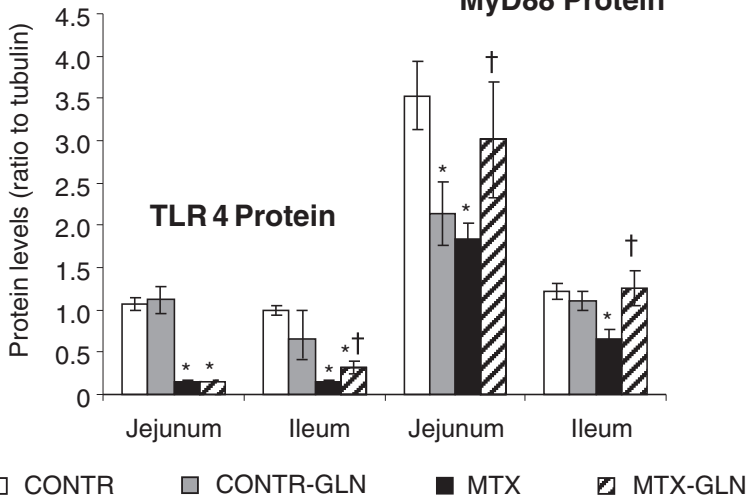

Supplement: MOESM3 [file 25655092]
